# Supplementary material for: Ternary solar cells with a mixed face-on and edge-on orientation enable an unprecedented efficiency of 12.1%
Source: Royal Society of Chemistry journal article supplement (doi:10.1039/c6ee02851a), 2016-11-11
Supplement: c6ee02851a1.pdf [file c6ee02851a1.pdf]

## Electronic supplementary Information

### **Ternary Solar Cells with a Mixed Face-On and Edge-On Enable an Unprecedented Efficiency of 12.1%.**

Tanya Kumari<sup>as</sup>, Sang Myeon Lee<sup>as</sup>, So-Huei Kang<sup>a</sup>, Shanshan Chen<sup>a</sup>, Changduk Yang<sup>a\*</sup>

<sup>a</sup> Department of Energy Engineering, School of Energy and Chemical Engineering, Low Dimensional Carbon Materials Center, Ulsan National Institute of Science and Technology (UNIST), 50 UNIST-gil, Ulsu-gun, Ulsan 44919, South Korea.

\*Corresponding authors, E-mail address: [yang@unist.ac.kr](mailto:yang@unist.ac.kr)

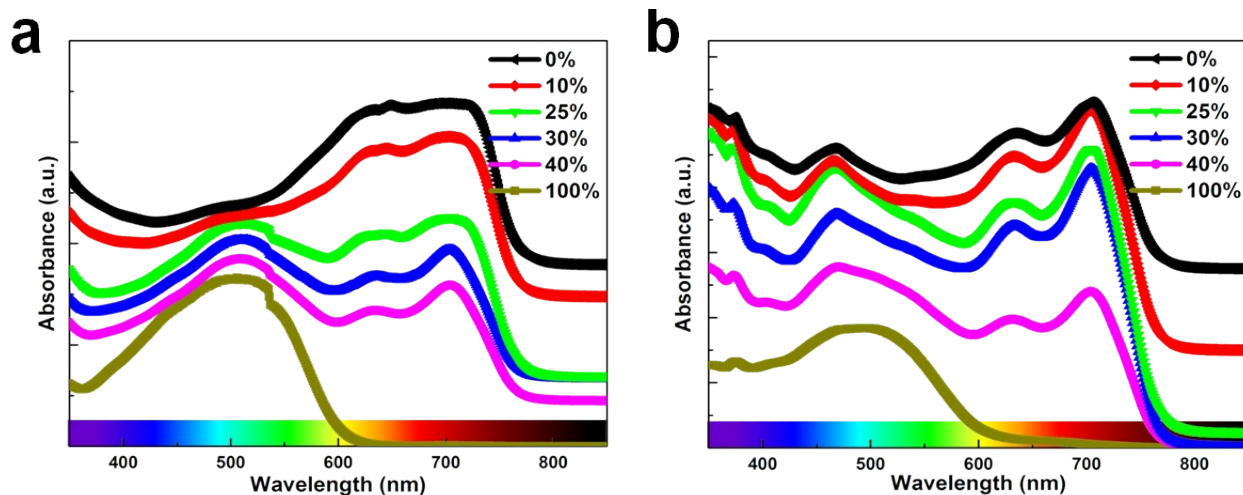

**Figure S1.** a) Absorption spectra of two donors' blend solutions. b) Absorption spectra of ternary blend solutions. Absorption graphs are plotted in stacked format for the ease in viewing the differences.

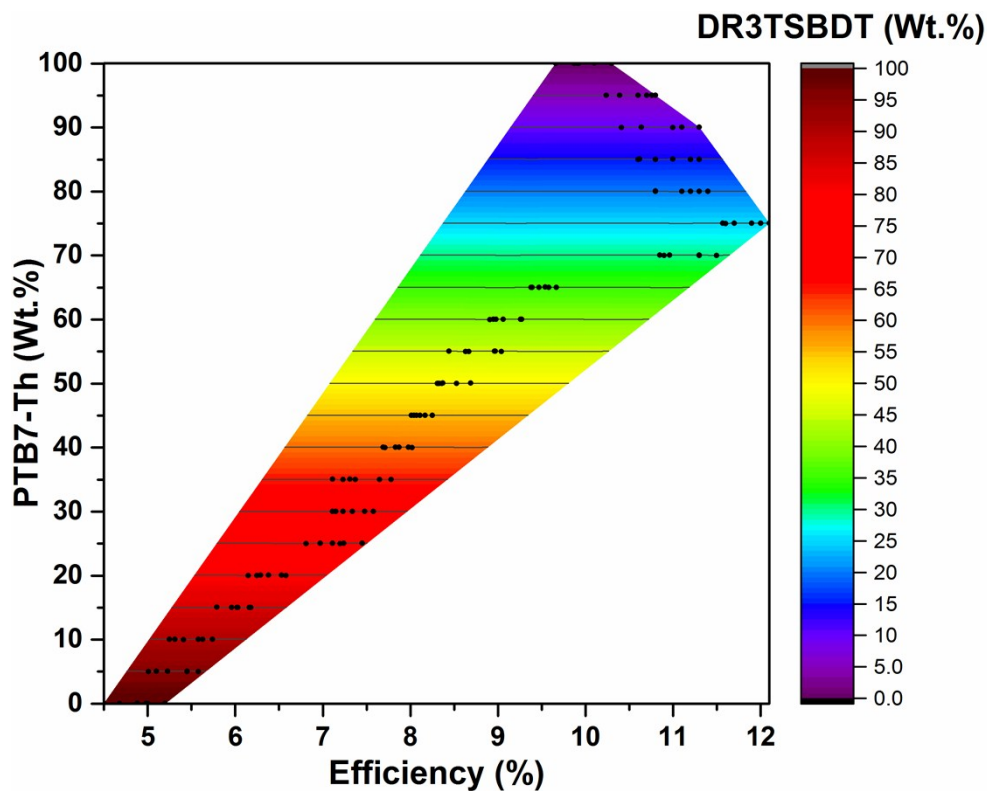

**Figure S2.** Contour plot showing the experimental power conversion efficiency (PCE) versus the wt.% of PTB7-Th (contour lines) and DR3TSBDT (colors) as two donor materials in the optimized ternary blends. Plotted for 6 devices in each case with maximum and minimum efficiency.

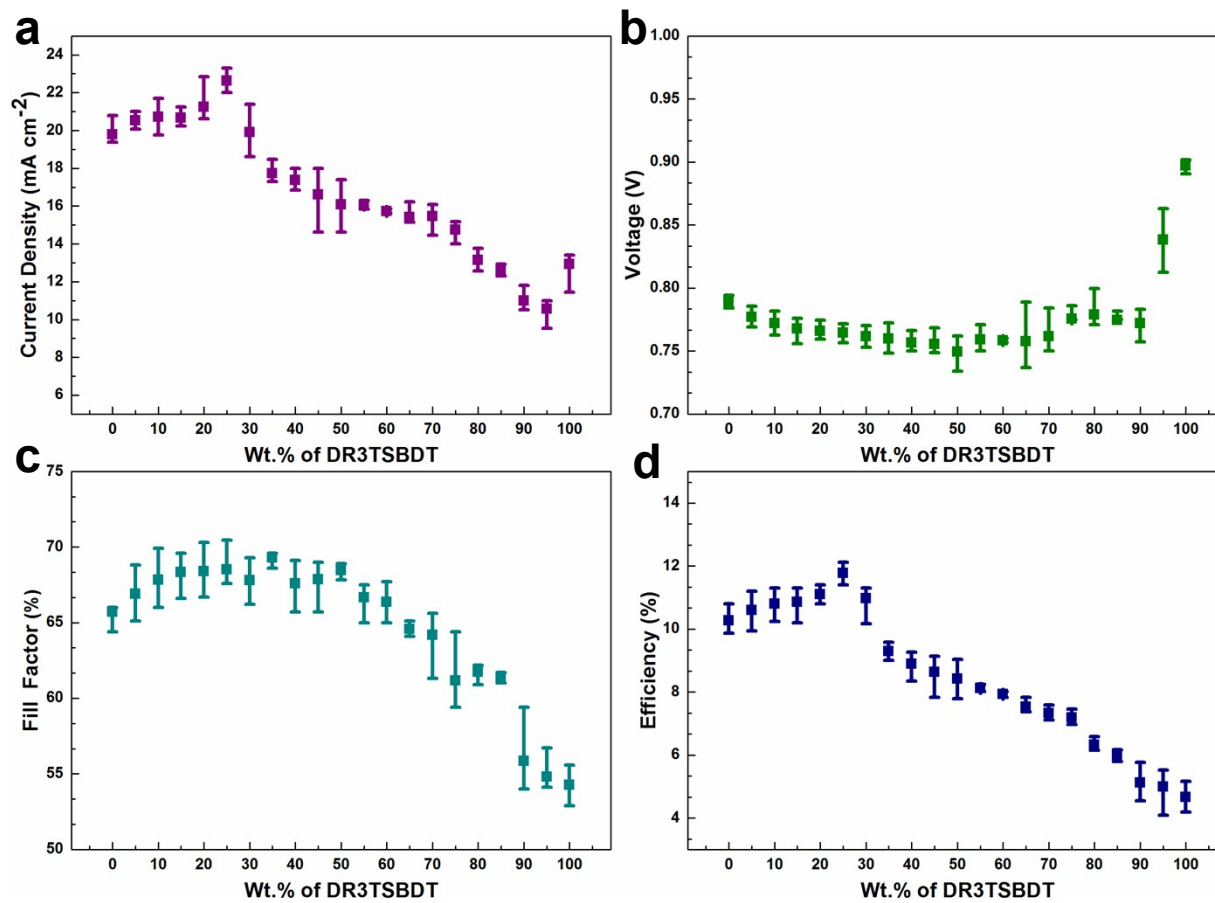

**Figure S3.** a) Current density. b) Voltage. c) Fill factor. d) Efficiency versus wt.% of DR3TSBDT used in the ternary blends.

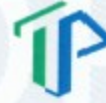

1. 의뢰자

기관명: Ulsan National Institute of Science and Technology  
주소: 50, UNIST-gil, Ulsan 44919, Republic of Korea

2. 시료 설명: Organic Thin-Film Solar Cells

3. 시험기간: 16.10.27 (1일간)

4. 시험방법: 시험 장비의 측정 방법에 의함.

5. 시험결과

| 시험항목                            | 결과                    | 비고 |
|---------------------------------|-----------------------|----|
| 태양전지평가시스템                       |                       |    |
| 기본사용<br>(Solar Simulator - 1kW) | Note the test results | -  |

이 시험보고서의 내용은 의뢰자가 제시한 시료에 한하며 용도이외의 사용을 금합니다.

|     |                      |                     |
|-----|----------------------|---------------------|
| 학 인 | 작성자<br>성명 : 김민지 (서명) | 팀장<br>성명 : 안창현 (서명) |
|-----|----------------------|---------------------|

2016. 10. 31.

(재)대구테크노파크 나노융합실용화센터장 (인)

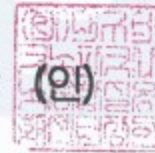

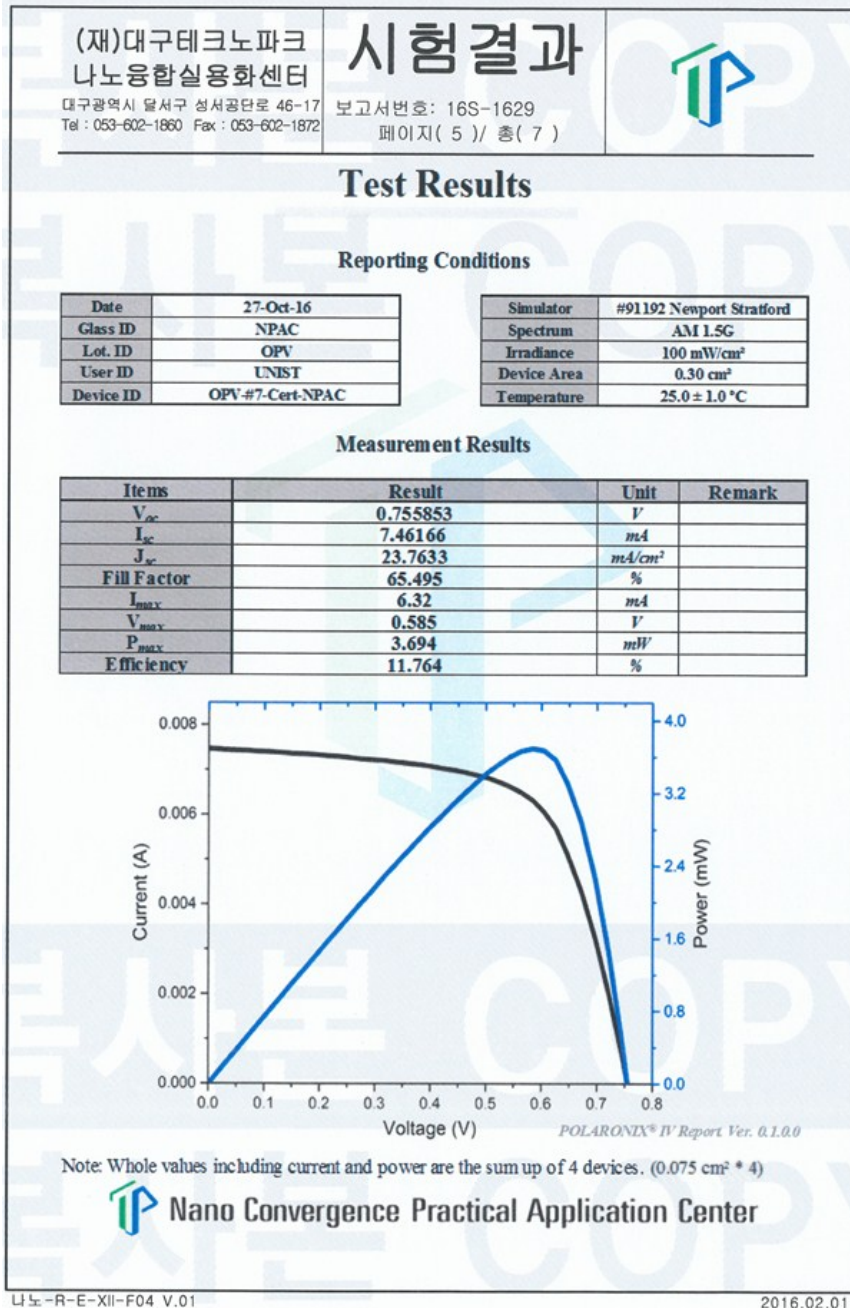

**Figure S4.** Independent certification confirming a power conversion efficiency of 11.76% by Nano Convergence Practical Application Center, South Korea.

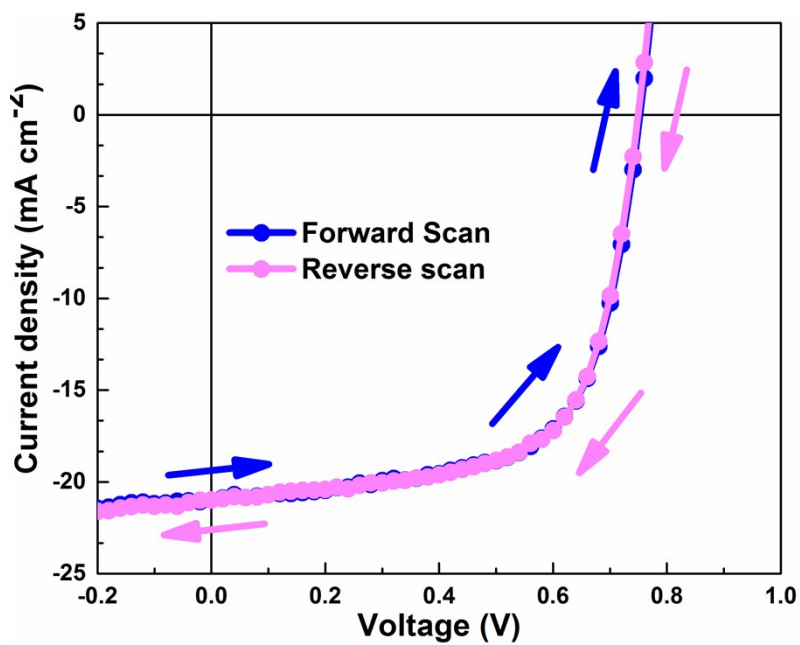

**Figure S5.** Hysteresis free  $J$ - $V$  curve of one of the best performing ternary device (25 wt.% of DR3TSBDT loading).

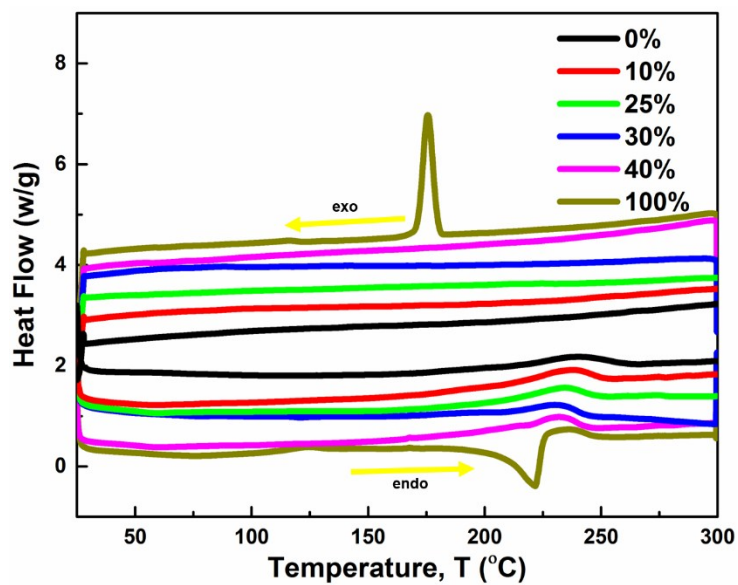

**Figure S6.** Differential scanning calorimetry (DSC) curves for the two donors' blend at different wt.% of DR3TSBDT loading.

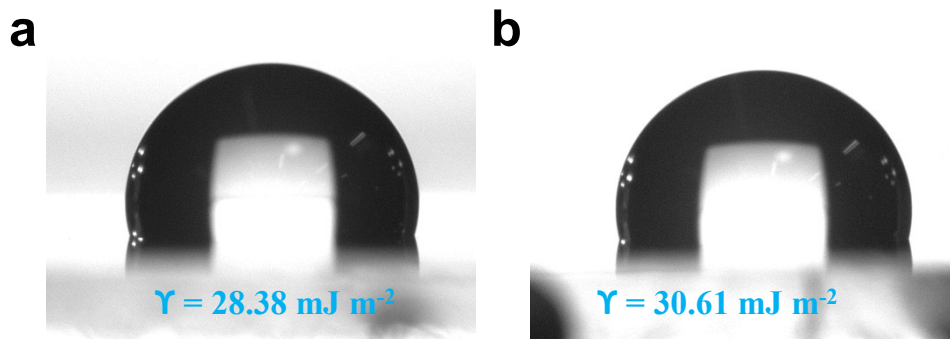

**Figure S7. Surface energy measurement.** Photographs of the drop of water on the surface of a) DR3TSBDT and b) PTB7-Th:PC<sub>71</sub>BM films on a glass substrate.

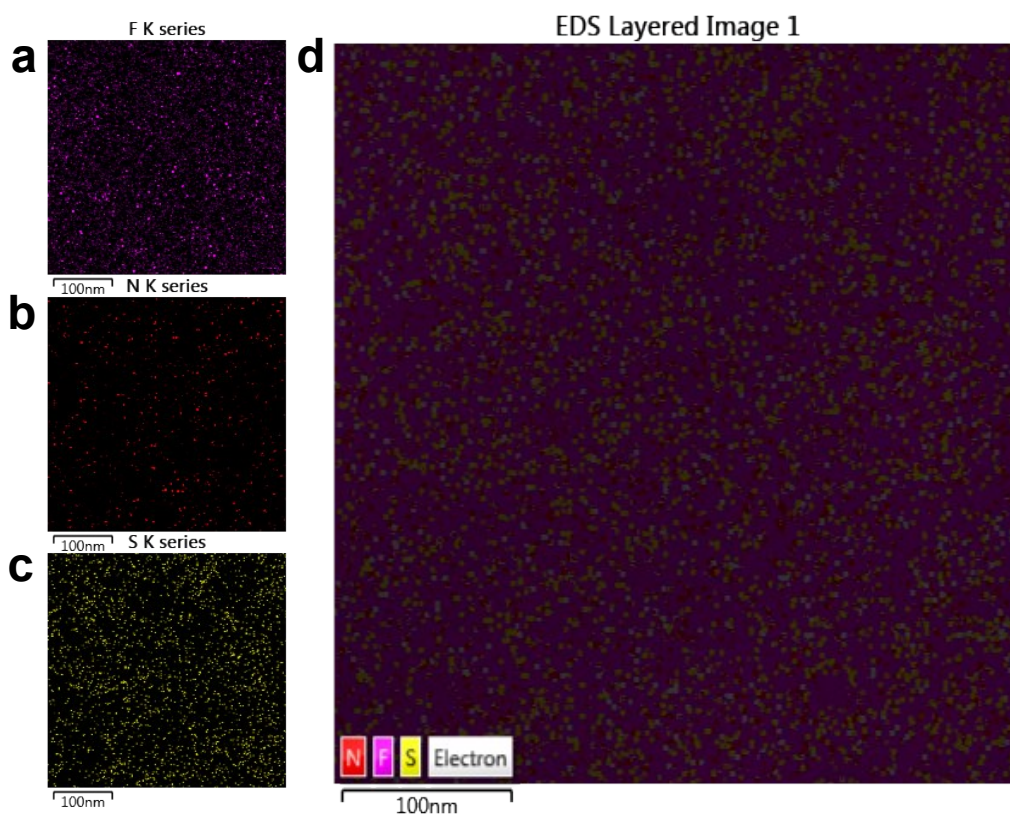

**Figure S8.** Energy dispersive X-ray elemental mapping; the fluorine (purple dots) and nitrogen (red dots) indicate PTB7-Th and DR3TSBDT, respectively in ternary blend for 25 wt.% of DR3TSBDT at higher resolution of 100 nm using HR-TEM equipped with an energy dispersive X-ray spectrometer.

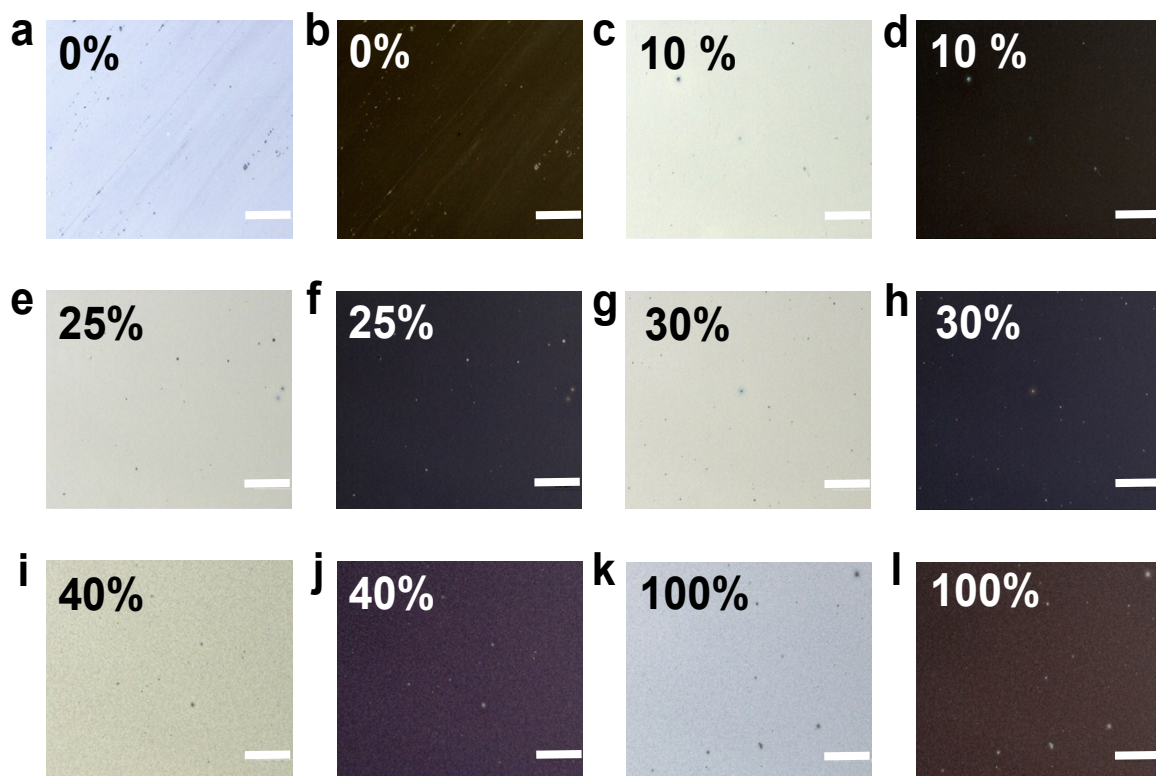

**Figure S9.** Optical microscopic images of ternary blends in normal and inverse color mode. a), b) 0%. c), d) 10%. e), f) 25%. g), h) 30%. i), j) 40%. k), l) 100% of DR3TSBDT in ternary blends. Scale bar is 20  $\mu\text{m}$ .



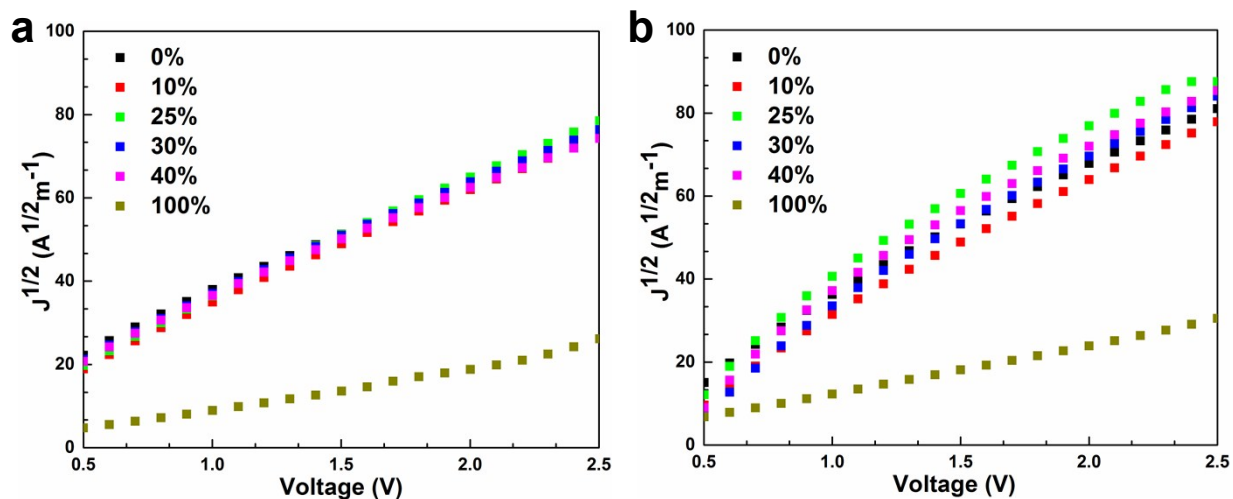

Figure S10. a) Hole mobility. b) Electron mobility of OSCs.

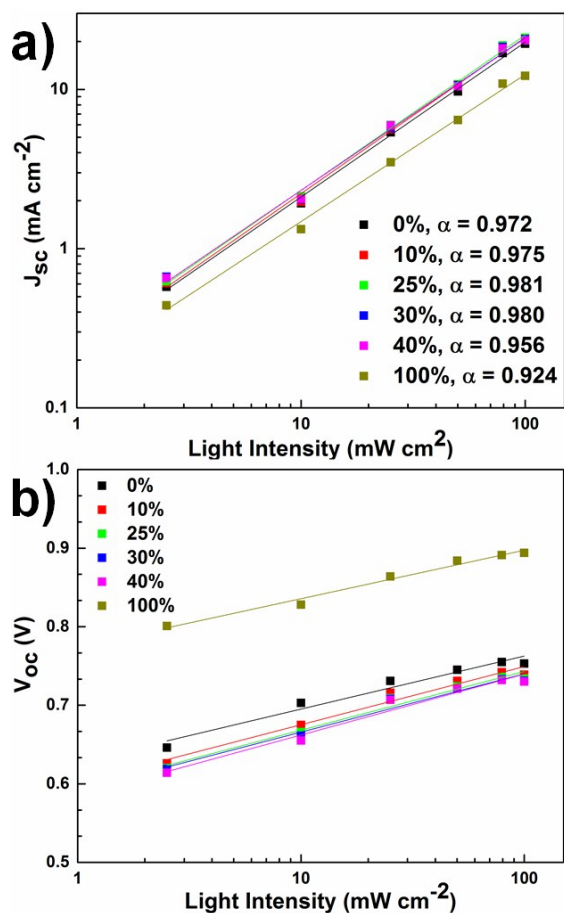

Figure S11. a) Dependence of current density ( $J_{sc}$ ) and b)  $V_{oc}$  on light intensity of OSCs.

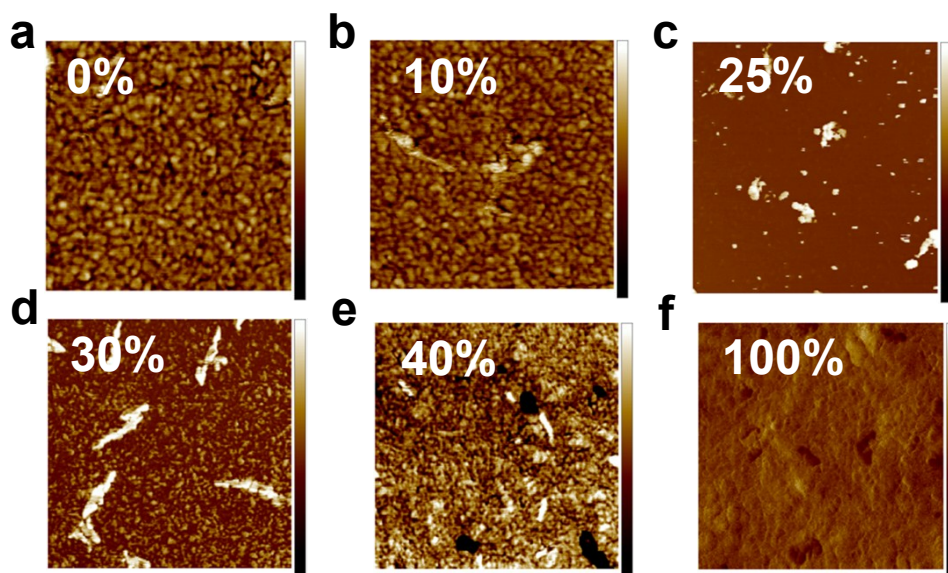

**Figure S12.** a) 0%, b) 10%, c) 25%, d) 30%, e) 40%, and f) 100% AFM phase images (scan size  $1 \times 1 \mu\text{m}$ ). Different color bars are used for the phase variance.

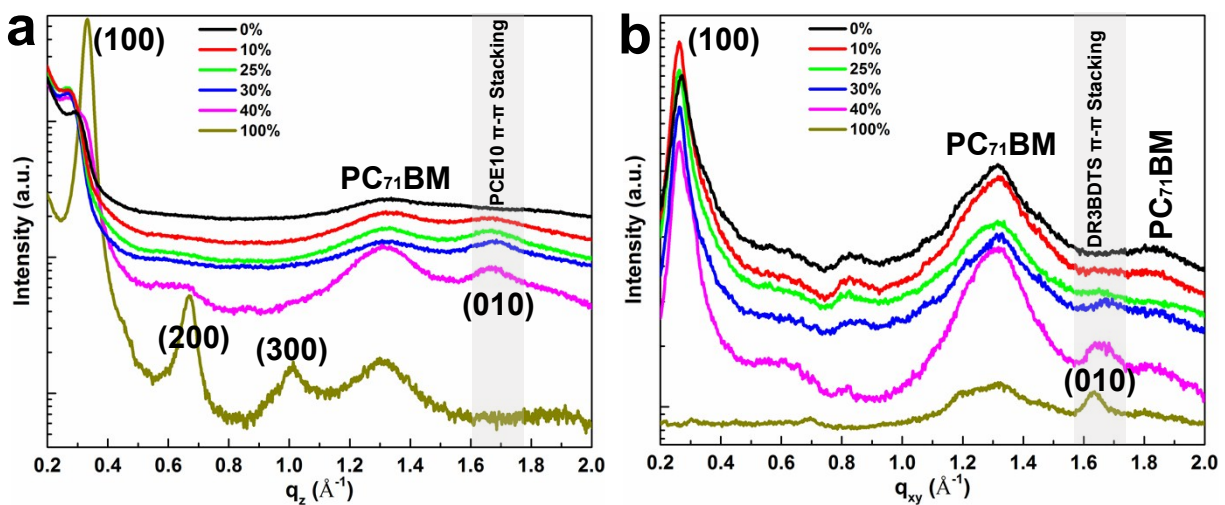

**Figure S13.** a) Out-of-plane. b) In-plane line cut profiles obtained from GIWAXS data.

**Table S1.** Lattice parameters in out-of-plane and in-plane direction for ternary system with different DR3TSBDT loading ratios.

| Active layer        | Unit cell long axis (100) ( $\text{\AA}^{-1}$ ) | $d_{100}$ ( $\text{\AA}$ ) | $\pi$ - $\pi$ stacking cell axis (010) ( $\text{\AA}^{-1}$ ) | $d_{010}$ ( $\text{\AA}$ ) |
|---------------------|-------------------------------------------------|----------------------------|--------------------------------------------------------------|----------------------------|
| <b>Out of plane</b> |                                                 |                            |                                                              |                            |
| 0 %                 | 0.2960                                          | 21.22                      | 1.689                                                        | 3.719                      |
| 10 %                | 0.2793                                          | 22.50                      | 1.677                                                        | 3.747                      |
| 25 %                | 0.2795                                          | 22.48                      | 1.675                                                        | 3.752                      |
| 30 %                | 0.2748                                          | 22.86                      | 1.674                                                        | 3.753                      |
| 40 %                | 0.2788                                          | 22.53                      | 1.672                                                        | 3.758                      |
| 100 %               | 0.3202                                          | 19.62                      |                                                              |                            |
| <b>In plane</b>     |                                                 |                            |                                                              |                            |
| 0 %                 | 0.2999                                          | 20.95                      |                                                              |                            |
| 10 %                | 0.2912                                          | 21.58                      | 1.652                                                        | 3.804                      |
| 25 %                | 0.2881                                          | 21.81                      | 1.648                                                        | 3.813                      |
| 30 %                | 0.2881                                          | 21.81                      | 1.669                                                        | 3.765                      |
| 40 %                | 0.3043                                          | 20.65                      | 1.650                                                        | 3.808                      |
| 100 %               | 0.3064                                          | 20.51                      | 1.632                                                        | 3.849                      |

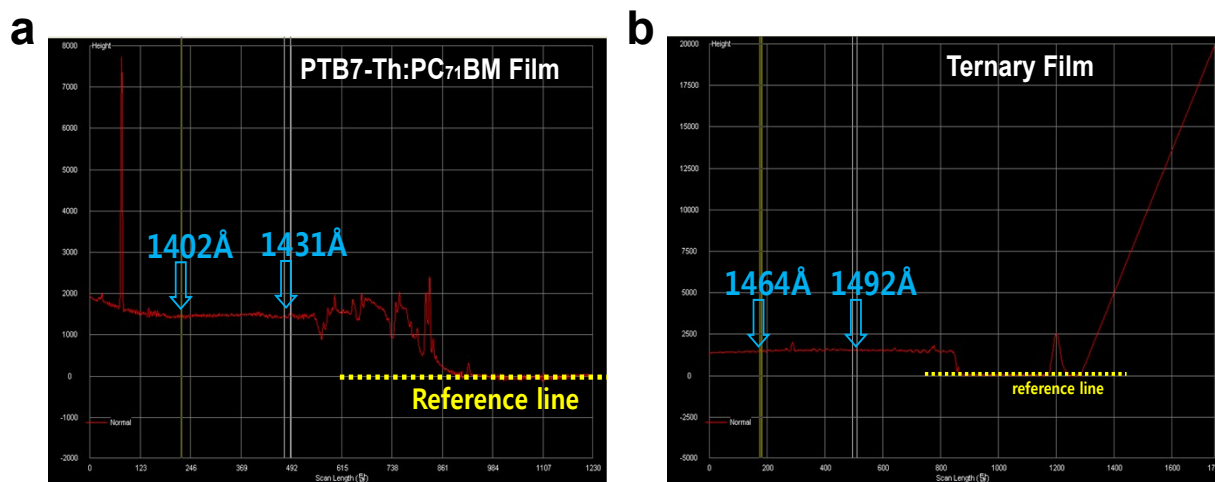

**Figure S14.** Thickness of optimized films in the range of 140-150 nm. a) PTB7-Th:PC<sub>71</sub>BM binary film. b) Ternary film.
